# Supplementary material
Source: PubMed Central journal article supplement (PMC8639452)
Supplement: mmc1.pdf [file mmc1.pdf]

**Supplemental information**

**IFP35 as a promising biomarker  
and therapeutic target for the syndromes induced  
by SARS-CoV-2 or influenza virus**

**Yang Yu, Na Xu, Qi Cheng, Fei Deng, Meiqin Liu, Airu Zhu, Yuan-Qin Min, Dan Zhu, Wenbo Huang, Xu Feng, Xizhong Jing, Ying Chen, Daoyuan Yue, Yawei Fan, Chang Shu, Qing Guan, Zifeng Yang, Jincun Zhao, Wenjun Song, Deyin Guo, Huanliang Liu, Jindong Zhao, Ping Lan, Zhengli Shi, Yingfang Liu, Xiaoping Chen, and Huanhuan Liang**

## SUPPLEMENTARY MATERIALS

**Table S1. The information of 112 laboratory confirmed COVID-19 patients in Group 1. Related to Figure 1.**

| Patients | Gender | Age (years) | Patient's condition on admission | Patient's turnover | LDH (135-214 U/L) | D-dimer < 0.5 µg/ml | Blood cell count ( $\times 10^9/L$ ) |            |            | Serum Conc. (pg/ml) |       |       |     | CRP (µg/ml) |
|----------|--------|-------------|----------------------------------|--------------------|-------------------|---------------------|--------------------------------------|------------|------------|---------------------|-------|-------|-----|-------------|
|          |        |             |                                  |                    |                   |                     | Platelet                             | Lymphocyte | Neutrophil | IFP35               | IL-6  | TNF   | PCT |             |
|          |        |             |                                  |                    |                   |                     | 125-350                              | 1.10-3.20  | 1.80-6.30  |                     |       |       |     |             |
| 3.83     | F      | 57          | mild                             | improve            | 179               | 0.26                | 274                                  | 1.78       | 3.25       | ND                  | 1.5   | 5.8   | NA  | 0.9         |
| 3.84     | M      | 40          | mild                             | improve            | 184               | 0.29                | 280                                  | 1.79       | 5.48       | 31.7                | 1.73  | 8.7   | NA  | 2.9         |
| 3.85     | F      | 56          | mild                             | improve            | 187               | < 0.22              | 217                                  | 2.44       | 3.60       | ND                  | 1.54  | 5.9   | NA  | 1.2         |
| 3.87     | M      | 60          | mild                             | improve            | 160               | 0.35                | 273                                  | 3.13       | 3.88       | 38.86               | 3     | 6.8   | NA  | 0.7         |
| 22       | F      | 63          | ordinary                         | improve            | 187               | 0.38                | 243                                  | 1.63       | 2.59       | ND                  | 4.32  | 4     | 20  | 0.3         |
| 27       | F      | 71          | ordinary                         | improve            | 255               | 0.52                | 137                                  | 0.89       | 2.15       | ND                  | 12.49 | 6.2   | 20  | 1           |
| 32       | M      | 38          | ordinary                         | improve            | 206               | 0.21                | 257                                  | 2.97       | 5.85       | ND                  | 3.61  | 6.1   | 30  | 21.4        |
| 33       | F      | 61          | ordinary                         | improve            | 182               | 0.45                | 149                                  | 1.06       | 3.31       | ND                  | 5.69  | 10.3  | 50  | 3.9         |
| 39       | M      | 71          | ordinary                         | improve            | 228               | 8.34                | 157                                  | 1.00       | 2.12       | ND                  | 37.56 | 9.5   | 40  | 78.2        |
| 57       | F      | 63          | ordinary                         | improve            | 241               | 0.23                | 335                                  | 2.35       | 2.56       | ND                  | 1.5   | 5.4   | 20  | 0.8         |
| 65       | F      | 65          | ordinary                         | improve            | 250               | 0.21                | 160                                  | 1.48       | 3.54       | ND                  | 3.99  | 9.3   | 70  | 1.6         |
| 76       | F      | 31          | ordinary                         | improve            | 181               | 1.34                | 370                                  | 1.50       | 3.06       | ND                  | 3.63  | 5.6   | 30  | 0.5         |
| 78       | F      | 68          | ordinary                         | improve            | 238               | 0.43                | 217                                  | 1.15       | 3.06       | ND                  | 22.11 | 6.3   | 20  | 23.4        |
| 97       | M      | 48          | ordinary                         | improve            | 242               | 0.56                | 237                                  | 1.04       | 3.37       | 481.24              | 8.11  | 7.5   | 30  | 4.1         |
| 98       | F      | 70          | ordinary                         | improve            | 221               | 0.23                | 251                                  | 0.93       | 2.49       | 67.82               | 2.76  | 4     | 40  | 2.1         |
| 99       | F      | 70          | ordinary                         | improve            | 169               | 2.37                | 232                                  | 0.78       | 4.98       | 159.47              | 1.5   | 5.9   | 60  | 1.4         |
| 102      | M      | 30          | ordinary                         | improve            | 207               | 1.01                | 233                                  | 2.20       | 3.80       | 13.32               | 1.83  | 4.7   | 60  | 1.1         |
| 1.1      | M      | 42          | ordinary                         | improve            | 209               | 0.36                | 295                                  | 1.10       | 1.56       | ND                  | 150.4 | 19.18 | 20  | 0.6         |
| 1.3      | F      | 45          | ordinary                         | improve            | 220               | 0.84                | 425                                  | 1.63       | 2.88       | 83.88               | 27.62 | 5.21  | 20  | 0.6         |

|      |   |    |          |             |     |        |     |      |      |         |       |       |     |       |
|------|---|----|----------|-------------|-----|--------|-----|------|------|---------|-------|-------|-----|-------|
| 1.4  | F | 61 | ordinary | improve     | 284 | 0.63   | 181 | 1.05 | 3.40 | 47.75   | 28.45 | 3.66  | 40  | 88.5  |
| 1.14 | F | 48 | ordinary | improve     | 287 | 0.38   | 385 | 1.56 | 2.82 | 431.84  | 5.04  | 11.42 | 20  | 2.0   |
| 1.18 | F | 75 | ordinary | improve     | 217 | 0.58   | 327 | 1.24 | 3.99 | 51.77   | 3.87  | 4.05  | 30  | 12.0  |
| 1.19 | F | 35 | ordinary | improve     | 341 | 0.34   | 242 | 1.41 | 1.21 | 533.42  | 6.36  | 3.66  | 20  | 58.9  |
| 1.23 | M | 59 | ordinary | improve     | 206 | < 0.22 | 115 | 2.75 | 3.40 | 124.02  | 6.03  | 23.06 | 20  | 1.7   |
| 1.25 | M | 65 | ordinary | improve     | 371 | 0.43   | 341 | 1.54 | 3.66 | 107.96  | 4.87  | 4.44  | 20  | 3.5   |
| 1.90 | F | 61 | ordinary | improve     | 300 | 0.25   | 582 | 1.49 | 4.79 | 501.31  | 0.55  | 9.87  | 50  | 1.6   |
| 1.91 | F | 63 | ordinary | improve     | 187 | 2.28   | 176 | 1.40 | 2.56 | ND      | 51.71 | 5.99  | 60  | 19    |
| 1.93 | M | 75 | ordinary | improve     | 209 | 0.85   | 335 | 1.82 | 4.82 | 1143    | 3.87  | 4.05  | 50  | 15.7  |
| 1.95 | F | 76 | ordinary | improve     | 225 | 0.43   | 264 | 1.61 | 3.34 | 1139.51 | 8.36  | 24.61 | 50  | 2.5   |
| 8    | M | 60 | severe   | improve     | 313 | 1.53   | 276 | 0.67 | 7.83 | 536.70  | 304.7 | 10.6  | 160 | 175.9 |
| 11   | M | 69 | severe   | improve     | 292 | 2.63   | 181 | 0.75 | 2.95 | 156.14  | 12.66 | 7.6   | 50  | 75.1  |
| 12   | M | 67 | severe   | improve     | 704 | 3.16   | 263 | 0.67 | 4.14 | 374.53  | 296.9 | 13.7  | 660 | 135   |
| 26   | M | 76 | severe   | improve     | 399 | 1.49   | 168 | 0.70 | 5.63 | 448.05  | 155   | 11.8  | 120 | 192.4 |
| 34   | F | 80 | severe   | improve     | 177 | 0.75   | 115 | 1.85 | 2.95 | 450.61  | 4.32  | 7.9   | 50  | 2.3   |
| 35   | M | 82 | severe   | improve     | 208 | 1.10   | 247 | 2.01 | 4.04 | 797.28  | 7.35  | 9.2   | 30  | 6.2   |
| 36   | M | 73 | severe   | aggravation | 246 | 0.40   | 329 | 1.73 | 3.53 | 588.02  | 15.86 | 9     | 40  | 40.6  |
| 38   | M | 66 | severe   | improve     | 249 | 0.35   | 345 | 1.23 | 3.85 | ND      | 3.13  | 5.2   | 20  | 1.5   |
| 40   | F | 63 | severe   | improve     | 391 | > 21   | 378 | 2.08 | 6.53 | 273.33  | 5.84  | 4     | 20  | 3.9   |
| 41   | F | 69 | severe   | improve     | 226 | 0.29   | 375 | 1.52 | 5.92 | 96.05   | 5.09  | 7.4   | 50  | 3.8   |
| 42   | F | 72 | severe   | improve     | 258 | 0.48   | 488 | 1.84 | 3.55 | 190.60  | 3.77  | 6.6   | 20  | 4.1   |
| 43   | M | 37 | severe   | improve     | 351 | 0.22   | 460 | 2.33 | 5.22 | 1092.75 | 4.03  | 14.9  | 60  | 5.2   |
| 46   | M | 64 | severe   | improve     | 452 | 0.80   | 320 | 0.71 | 3.83 | 248.40  | 67.21 | 9.2   | 60  | 46.2  |
| 47   | F | 74 | severe   | improve     | 307 | 9.76   | 168 | 1.69 | 2.15 | 629.75  | 22.63 | 8.3   | 40  | 27.2  |
| 51   | F | 38 | severe   | improve     | 243 | 1.47   | 342 | 1.47 | 7.41 | 769.71  | 5.31  | 4.3   | 20  | 1.9   |

|      |   |    |        |             |     |      |     |        |       |         |       |       |     |       |
|------|---|----|--------|-------------|-----|------|-----|--------|-------|---------|-------|-------|-----|-------|
| 52   | M | 74 | severe | improve     | 284 | 0.64 | 209 | 0.68   | 2.80  | ND      | 15.63 | 8.3   | 50  | 32.5  |
| 53   | F | 69 | severe | improve     | 350 | 0.48 | 217 | 0.78   | 3.41  | 88.17   | 103.7 | 13    | 370 | 81.8  |
| 54   | M | 57 | severe | aggravation | 339 | 2.12 | 319 | 0.49 ↓ | 6.23  | 458.49  | 57.4  | 7.1   | 50  | 114.7 |
| 55   | M | 72 | severe | improve     | 267 | 0.87 | 363 | 0.97   | 7.00  | ND      | 53.35 | 13.1  | 110 | 175.8 |
| 56   | F | 86 | severe | improve     | 368 | 1.05 | 238 | 0.80   | 3.54  | 328.48  | 39.99 | 13.1  | 130 | 131.1 |
| 58   | F | 69 | severe | improve     | 271 | 2.57 | 240 | 0.52   | 2.55  | 261.78  | 16.51 | 4.4   | 20  | 25.7  |
| 59   | M | 65 | severe | improve     | 272 | 1.53 | 212 | 0.81   | 4.29  | ND      | 43.7  | 12.2  | 170 | 121.9 |
| 60   | M | 82 | severe | improve     | 326 | 2.54 | 109 | 0.77   | 5.34  | 880.01  | 58.74 | 9     | 190 | 77.6  |
| 61   | F | 46 | severe | improve     | 288 | 1.22 | 417 | 1.51   | 6.90  | 403.33  | 1.93  | 8.7   | 30  | 8.0   |
| 62   | F | 64 | severe | improve     | 266 | 0.51 | 172 | 0.73   | 3.76  | ND      | 35.08 | 5.8   | 50  | 88.2  |
| 63   | M | 70 | severe | improve     | 777 | > 21 | 359 | 0.77   | 11.94 | 40.90   | 99.64 | NA    | 160 | 162.6 |
| 64   | M | 78 | severe | aggravation | 479 | 1.83 | 211 | 0.64   | 6.20  | 139.39  | 119.6 | 15.9  | 70  | 42.6  |
| 67   | M | 82 | severe | improve     | 218 | 0.75 | 285 | 1.15   | 5.22  | ND      | 28.38 | 16.2  | 70  | 35.3  |
| 68   | F | 58 | severe | improve     | 263 | 0.53 | 309 | 1.40   | 2.07  | 155.15  | 1.65  | 5.9   | 20  | 1.0   |
| 70   | F | 46 | severe | improve     | 248 | 0.24 | 453 | 1.55   | 5.54  | 686.98  | 3.53  | 5.3   | 20  | 2.0   |
| 71   | M | 80 | severe | improve     | 192 | 2.36 | 129 | 1.30   | 5.10  | 344.24  | 17.41 | 8.5   | 40  | 6.4   |
| 72   | F | 58 | severe | improve     | 346 | 0.83 | 408 | 0.94   | 11.53 | ND      | 31.14 | 9.8   | 30  | 80.7  |
| 75   | M | 75 | severe | improve     | 325 | 1.39 | 259 | 0.87   | 4.92  | ND      | 9.54  | 8.3   | 20  | 4.9   |
| 100  | F | 67 | severe | aggravation | 190 | 1.14 | 275 | 0.85   | 3.23  | 3287.19 | 20.77 | 8.7   | 60  | 25.9  |
| 1.2  | F | 58 | severe | improve     | 202 | 0.23 | 247 | 1.44   | 2.36  | 637.78  | 3.54  | 7.54  | 20  | 0.8   |
| 1.7  | F | 70 | severe | improve     | 315 | 1.89 | 285 | 0.90   | 6.49  | 4298.37 | 13.17 | 16.08 | 80  | 9.9   |
| 1.9  | M | 77 | severe | aggravation | 248 | 2.67 | 295 | 1.62   | 8.94  | 172.32  | 37.92 | 19.57 | 90  | 23.5  |
| 1.10 | M | 65 | severe | improve     | 568 | 2.75 | 306 | 0.97   | 6.79  | 1713.48 | 3.54  | 19.18 | 450 | 91.6  |
| 1.15 | F | 61 | severe | improve     | 274 | 0.48 | 223 | 0.74   | 2.98  | 388.93  | 39.58 | 23.83 | 30  | 13.1  |
| 1.17 | F | 71 | severe | improve     | 424 | 4.68 | 279 | 0.68   | 7.66  | 1099.37 | 68.65 | 7.15  | 330 | 258.0 |

|      |   |    |        |             |     |       |     |        |       |         |       |       |     |       |
|------|---|----|--------|-------------|-----|-------|-----|--------|-------|---------|-------|-------|-----|-------|
| 1.20 | M | 28 | severe | improve     | 258 | 0.44  | 533 | 1.63   | 7.39  | 2431.95 | 4.87  | 12.58 | NA  | 1.2   |
| 1.24 | M | 77 | severe | improve     | 267 | 2.75  | 330 | 0.68   | 5.77  | 2235.27 | 220.3 | 26.94 | 50  | 146.3 |
| 1.28 | M | 70 | severe | improve     | 268 | 2.67  | 383 | 2.05   | 6.31  | 1637.22 | 7.69  | 0.95  | 50  | 5.9   |
| 1.30 | F | 80 | severe | improve     | 198 | 0.52  | 250 | 0.61   | 5.77  | 509.34  | 9.69  | 6.38  | 30  | 5.0   |
| 1.31 | M | 72 | severe | improve     | 313 | 9.73  | 173 | 0.92   | 4.21  | 1524.83 | 27.46 | 8.32  | 70  | 58.4  |
| 1.37 | M | 56 | severe | improve     | 314 | 1.31  | 129 | 0.55   | 2.10  | 1103.38 | 17.66 | 9.48  | 50  | 68.3  |
| 1.45 | M | 51 | severe | improve     | 506 | 1.27  | 239 | 0.83   | 4.34  | 1171.62 | 68.11 | 16.08 | 210 | 99.6  |
| 1.49 | F | 64 | severe | improve     | 222 | 0.37  | 258 | 1.62   | 2.22  | 557.51  | 1.59  | 4.05  | 30  | 2.7   |
| 1.50 | F | 66 | severe | improve     | 291 | 0.77  | 327 | 1.39   | 5.47  | 3383.22 | 8.13  | 4.05  | 20  | 6.2   |
| 1.69 | M | 60 | severe | aggravation | 681 | 11.07 | 391 | 1.14   | 11.66 | 207.66  | 86.25 | 5.60  | 460 | 217.5 |
| 1.73 | F | 66 | severe | improve     | 290 | 1.10  | 277 | 1.01   | 2.18  | 1019.09 | 11.68 | 16.85 | 120 | 42.7  |
| 1.74 | F | 63 | severe | improve     | 237 | 0.42  | 131 | 0.50 ↓ | 1.70  | 778.26  | 27.96 | 7.15  | 30  | 22    |
| 1.77 | M | 50 | severe | aggravation | 414 | 1.79  | 177 | 0.92   | 5.11  | 736.27  | 86.25 | 10.64 | 540 | 68.2  |
| 1.79 | F | 76 | severe | improve     | 497 | 5.21  | 223 | 0.85   | 5.61  | 2520.25 | 69.31 | 30.04 | 80  | 104.4 |
| 1.80 | M | 38 | severe | improve     | 360 | 0.65  | 211 | 0.92   | 3.36  | 593.63  | 18.99 | 12.20 | 100 | 63.5  |
| 1.81 | F | 76 | severe | improve     | 418 | > 60  | 193 | 0.43   | 7.09  | 593.63  | 12.18 | 11.03 | 710 | 118.4 |
| 1.82 | F | 55 | severe | improve     | 220 | 0.23  | 194 | 1.01   | 3.47  | 738.13  | 31.61 | 3.27  | 40  | 25.6  |
| 1.83 | F | 69 | severe | improve     | 193 | 0.38  | 207 | 1.67   | 2.75  | 561.52  | 10.68 | 6.77  | 50  | 18.4  |
| 1.84 | F | 59 | severe | improve     | 243 | 0.27  | 404 | 1.60   | 2.99  | 509.34  | 5.70  | 12.20 | 60  | 10.9  |
| 1.85 | F | 69 | severe | improve     | 199 | 0.38  | 276 | 1.36   | 2.32  | 481.24  | 1.88  | 8.32  | 50  | 2.1   |
| 1.86 | M | 79 | severe | improve     | 269 | 0.78  | 165 | 0.21   | 3.37  | 1063.24 | 70.97 | 14.91 | 90  | 72.3  |
| 1.87 | F | 61 | severe | improve     | 247 | 0.49  | 429 | 0.52   | 6.36  | 3993.32 | 6.36  | 18.79 | 40  | 10.5  |
| 1.88 | M | 65 | severe | improve     | 308 | 0.72  | 282 | 0.83   | 10.03 | 6257.1  | 9.35  | 18.01 | 80  | 15.8  |
| 1.89 | F | 69 | severe | improve     | 199 | 0.38  | 276 | 1.36   | 2.32  | 2078.74 | 1.55  | 8.32  | 50  | 2.1   |
| 1.92 | M | 69 | severe | improve     | 246 | 0.79  | 335 | 0.98   | 3.69  | 1059.23 | 14.17 | 7.15  | 50  | 31.2  |

|       |   |    |          |             |      |       |     |        |       |         |       |       |      |       |
|-------|---|----|----------|-------------|------|-------|-----|--------|-------|---------|-------|-------|------|-------|
| 1.94  | M | 67 | severe   | improve     | 260  | 1.67  | 230 | 0.82   | 3.51  | 3013.95 | 9.69  | 9.87  | 50   | 17.6  |
| 1.96  | F | 60 | severe   | improve     | 320  | 0.60  | 330 | 1.34   | 1.84  | 898.68  | 6.03  | 4.83  | 70   | 14.0  |
| 1.101 | F | 76 | severe   | improve     | 320  | 1.95  | 237 | 0.52   | 9.91  | 1225.14 | 49.92 | 7.3   | 850  | 185.9 |
| 1.112 | F | 60 | severe   | aggravation | 622  | > 21  | 622 | 0.58   | 18.87 | 493.46  | 268   | 10.2  | NA   | NA    |
| 1.16  | F | 60 | severe   | death       | 1549 | > 21  | 146 | 0.64 ↓ | 16.00 | 5141.27 | 179.1 | 31.20 | 670  | 270.6 |
| 1.21  | F | 87 | severe   | death       | 325  | 1.23  | 145 | 0.73 ↓ | 1.77  | 493.28  | 29.45 | 11.42 | 100  | 75.5  |
| 13    | M | 73 | critical | death       | 1772 | > 21  | 42  | 0.44 ↓ | 8.59  | 2144.59 | 111.7 | 22.8  | 940  | 274.1 |
| 44    | F | 82 | critical | death       | 664  | > 21  | 131 | 0.64 ↓ | 15.44 | 186.66  | 207.7 | 13.3  | 870  | 293.4 |
| 106   | M | 75 | critical | death       | 370  | 19.34 | 64  | 0.69 ↓ | 10.13 | 3709.16 | 322.1 | 12.6  | 140  | 174.7 |
| 109   | M | 70 | critical | death       | 721  | > 21  | 31  | 0.12 ↓ | 10.29 | 214.74  | 249.2 | 8.2   | 130  | 69    |
| 110   | M | 71 | critical | death       | 489  | 4.27  | 141 | 0.23 ↓ | 5.98  | 451.62  | 232.5 | 25.4  | 890  | 147   |
| 48    | M | 86 | critical | aggravation | 480  | 1.49  | 259 | 0.33 ↓ | 5.47  | 103.93  | 64.88 | 17.3  | 450  | 189.7 |
| 103   | F | 60 | critical | aggravation | 622  | > 21  | 55  | 0.58 ↓ | 18.87 | 74.20   | 268   | 6.2   | 660  | 104.8 |
| 104   | F | 67 | critical | aggravation | 813  | 8.96  | 275 | 0.29 ↓ | 12.66 | 31.56   | 258.4 | 9.7   | 110  | 142.7 |
| 105   | M | 84 | critical | aggravation | 464  | 13.52 | 54  | 0.32 ↓ | 7.58  | 151.05  | 210   | 18.9  | 360  | 120.9 |
| 107   | M | 58 | critical | aggravation | 736  | 1.78  | 173 | 0.35 ↓ | 7.32  | 169.47  | 198   | 11.8  | 100  | 18.7  |
| 111   | F | 80 | critical | aggravation | 362  | 2.88  | 84  | 0.53 ↓ | 12.10 | 73.14   | 103.1 | 14.5  | 230  | 145.2 |
| 1.29  | F | 58 | critical | aggravation | 310  | 1.77  | 181 | 0.67 ↓ | 3.34  | 501.84  | 81.77 | 0.95  | 3530 | 150.8 |

The patients were blooded on admission. Their sera were isolated and used for laboratory detection. “ND” meant the concentration was not detectable. “NA” meant the data was not available. For statistical comparisons, undetectable data (ND) were defined as “0”. LDH is the abbreviation of lactate dehydrogenase. Lymphocyte count less than  $1.10 \times 10^9/L$  was highlighted using “↓”.

**Table S2. The information of 38 laboratory confirmed COVID-19 patients in Group 2. Related to Figure 3.**

| Patients | Gender | Age (years) | Patient's condition on admission | Patient's turnover | Days of treatment | LDH (135-214 U/L) | D-dimer < 0.5 µg/ml | Blood cell count ( $\times 10^9/L$ ) |            |            | Serum Conc. (pg/ml) |       |      |     | CRP (µg/ml) |
|----------|--------|-------------|----------------------------------|--------------------|-------------------|-------------------|---------------------|--------------------------------------|------------|------------|---------------------|-------|------|-----|-------------|
|          |        |             |                                  |                    |                   |                   |                     | Platelet                             | Lymphocyte | Neutrophil | IFP35               | IL-6  | TNF  | PCT |             |
|          |        |             |                                  |                    |                   |                   |                     | 125-350                              | 1.10-3.20  | 1.80-6.30  |                     |       |      |     |             |
| 2.20     | F      | 48          | mild                             | improve            | 6                 | 198               | 0.21                | 159                                  | 1.30       | 2.37       | 34.88               | 1.5   | 4.3  | 20  | 0.4         |
| 2.28     | M      | 54          | mild                             | improve            | 19                | 195               | < 0.22              | 146                                  | 1.76       | 2.83       | 32.89               | 1.5   | 5.2  | 20  | 1.8         |
| 2.29     | F      | 51          | mild                             | improve            | 5                 | 234               | 2.49                | 188                                  | 2.13       | 2.20       | 42.84               | 1.98  | 4.6  | 20  | 0.3         |
| 2.30     | F      | 35          | mild                             | improve            | 19                | 140               | 1.04                | 219                                  | 1.56       | 2.95       | ND                  | 1.5   | 4    | 20  | 0.3         |
| 2.34     | F      | 45          | mild                             | improve            | 5                 | 154               | < 0.22              | 140                                  | 1.40       | 2.77       | ND                  | 1.5   | 4.6  | 20  | 0.6         |
| 2.12     | F      | 70          | severe                           | improve            | 21                | 222               | 1.05                | 349                                  | 2.10       | 2.63       | 34.33               | 1.5   | 9.1  | 30  | 2.2         |
| 2.14     | F      | 57          | severe                           | improve            | 21                | 293               | 0.70                | 167                                  | 1.61       | 1.97       | 269.74              | 1.73  | 5.1  | 30  | 0.3         |
| 2.15     | F      | 78          | severe                           | improve            | 21                | 149               | 0.39                | 206                                  | 1.14       | 3.36       | 122.45              | 3.4   | 6.2  | 30  | 1.5         |
| 2.37     | F      | 84          | severe                           | improve            | 19                | 223               | 1.53                | 256                                  | 0.76       | 8.32       | ND                  | 20.7  | 10.4 | 40  | 12.9        |
| 2.41     | M      | 44          | severe                           | improve            | 21                | 194               | 0.32                | aggregation                          | 1.27       | 1.99       | 22.80               | 7.1   | 1.5  | 70  | 2.6         |
| 3.12     | M      | 56          | severe                           | improve            | 22                | 259               | 2.54                | 422                                  | 1.37       | 7.87       | 632.00              | 12.15 | 6    | 110 | 47.4        |
| 3.90     | M      | 42          | severe                           | improve            | 27                | 387               | 2.17                | 173                                  | 1.48       | 11.64      | 192.90              | 8     | 18.4 | 200 | 29.9        |
| 2.11     | F      | 81          | critical                         | improve            | 19                | 160               | 0.23                | 129                                  | 0.50 ↓     | 2.05       | 48.03               | 6.75  | 6.6  | 40  | 0.5         |
| 2.25     | F      | 46          | critical                         | improve            | 8                 | 179               | 2.12                | 130                                  | 0.20 ↓     | 4.33       | 126.44              | 8.5   | 31.2 | 300 | 24.1        |
| 2.27     | M      | 69          | critical                         | improve            | 22                | 231               | 2.47                | 312                                  | 1.33       | 4.81       | 158.28              | 5.72  | 13.9 | 80  | 4.1         |
| 2.31     | M      | 46          | critical                         | improve            | 10                | 265               | 2.82                | 94                                   | 1.30       | 7.83       | ND                  | 19.62 | 4.8  | 20  | 19.3        |
| 2.32     | M      | 54          | critical                         | improve            | 21                | 309               | 9.22                | 315                                  | 1.12       | 4.37       | 14.97               | 3.3   | 4    | 40  | 12.7        |
| 3.13     | F      | 55          | critical                         | improve            | 31                | 300               | 2.56                | 522                                  | 1.62       | 7.57       | ND                  | 9.61  | 9.8  | 40  | 69.3        |
| 3.14     | F      | 73          | critical                         | improve            | 22                | 236               | 5.27                | 208                                  | 1.61       | 3.65       | 695.69              | 9.02  | 4    | 140 | 5.9         |
| 3.57     | M      | 66          | critical                         | improve            | 24                | 210               | < 0.22              | 239                                  | 1.84       | 3.05       | 154.30              | 2.37  | 8.3  | 40  | 0.8         |

|      |   |    |          |             |    |      |       |     |        |       |        |       |      |       |       |
|------|---|----|----------|-------------|----|------|-------|-----|--------|-------|--------|-------|------|-------|-------|
| 3.59 | M | 47 | critical | improve     | 23 | 136  | 1.89  | 364 | 0.78   | 3.15  | ND     | 4.65  | 6.7  | 180   | 5.2   |
| 3.60 | M | 89 | critical | improve     | 23 | 327  | 1.08  | 149 | 2.61   | 2.33  | ND     | 2.27  | 6.5  | 30    | 1.8   |
| 3.62 | M | 81 | critical | improve     | 24 | 163  | 2.90  | 195 | 1.59   | 3.92  | 249.84 | 6.2   | 15.1 | 80    | 4.6   |
| 3.63 | M | 72 | critical | improve     | 24 | 186  | 0.72  | 257 | 0.74   | 4.08  | ND     | 91.01 | 10.8 | 90    | 17.3  |
| 3.81 | F | 65 | critical | improve     | 17 | 213  | 3.71  | 296 | 1.12   | 4.75  | 600.15 | 30.62 | 8.5  | 60    | 30.5  |
| 3.91 | M | 56 | severe   | aggravation | 27 | 784  | 2.98  | 73  | 0.71   | 13.04 | 458.14 | 65.63 | 13   | 1430  | 82.1  |
| 3.88 | M | 69 | critical | aggravation | 17 | 271  | 11.80 | 99  | 1.63   | 14.79 | 198.67 | 25.2  | 236. | 2.44  | 212.6 |
| 3.10 | F | 63 | severe   | death       | 26 | 284  | 1.78  | 83  | 0.28 ↓ | 4.17  | 2853   | 15.7  | 136  | 1260  | 74.8  |
| 2.18 | F | 68 | severe   | death       | 20 | 456  | 15.01 | 186 | 0.48 ↓ | 17.6  | 2726   | 37.14 | 11.5 | 2680  | 42.1  |
| 3.64 | F | 57 | severe   | death       | 27 | 1052 | 1.01  | 24  | 2.00   | 30.20 | 1704.4 | 675.8 | 22.4 | 1940  | 298.2 |
| 3.1  | M | 71 | severe   | death       | 32 | 612  | 2.07  | 16  | 0.43 ↓ | 17.64 | 5938.4 | 121.7 | 8.7  | 1140  | 67.7  |
| 3.4  | M | 68 | severe   | death       | 26 | 742  | 1.81  | 32  | 0.55 ↓ | 14.26 | 9545   | 72.37 | 20.4 | 25130 | 112.3 |
| 2.24 | M | 78 | critical | death       | 6  | 338  | 4.73  | 81  | 0.11 ↓ | 11.63 | 1046   | 27.43 | 9.1  | 620   | 47    |
| 2.40 | M | 67 | critical | death       | 4  | 354  | 5.17  | 58  | 0.81 ↓ | 21.16 | 3553.9 | 2308  | 19.6 | 2080  | 159.5 |
| 3.2  | F | 68 | critical | death       | 31 | 402  | 0.33  | 275 | 0.75 ↓ | 9.50  | 1227.3 | 8.07  | 4.6  | 40    | 17.6  |
| 3.61 | M | 65 | critical | death       | 31 | 346  | 5.42  | 43  | 1.43   | 13.67 | 12435  | 5000  | 38.2 | 24840 | 300   |
| 3.86 | M | 66 | critical | death       | 34 | 248  | 3.83  | 49  | 1.20   | 26.45 | 9644.5 | 61.5  | 5000 | 10020 | 221.8 |
| 3.89 | M | 51 | critical | death       | 27 | 440  | 3.82  | 166 | 0.20 ↓ | 22.47 | 839    | 7.7   | 31   | 570   | 151.7 |

The patients were blooded after the treatment. Their sera were isolated and used for laboratory detection. “ND” meant the concentration was not detectable. “NA” meant the data was not available. For statistical comparisons, undetectable data (ND) were defined as “0”. LDH is the abbreviation of lactate dehydrogenase. Lymphocyte count less than  $1.10 \times 10^9/L$  was highlighted using “↓”.



**Table S3. The information of 8 laboratory confirmed COVID-19 patients in Group 3. Related to Figure 3.**

| Patients   | Gender | Age (years) | Patient's condition on admission | Patient's turnover | Blood date | LDH (135-214 U/L) | D-dimer < 0.5 µg/ml | Blood cell count ( $\times 10^9/L$ ) |            |            | Serum Conc. (pg/ml) |       |      |      | CRP (µg/ml) |
|------------|--------|-------------|----------------------------------|--------------------|------------|-------------------|---------------------|--------------------------------------|------------|------------|---------------------|-------|------|------|-------------|
|            |        |             |                                  |                    |            |                   |                     | Platelet                             | Lymphocyte | Neutrophil | IFP35               | IL-6  | TNF  | PCT  |             |
|            |        |             |                                  |                    |            |                   |                     | 125-350                              | 1.10-3.20  | 1.80-6.30  |                     |       |      |      |             |
| 2501787353 | M      | 60          | severe                           | improve            | 2/10/2020  | 313               | 1.53                | 276                                  | 0.67       | 7.83       | 536.70              | 304.7 | 10.6 | 160  | 175.9       |
|            |        |             |                                  |                    | 3/1/2020   | 258               | 1.65                | 451                                  | 1.26       | 63.5       | ND                  | 6.95  | 11.7 | 90   | 7.8         |
| 2501798952 | M      | 69          | severe                           | improve            | 2/10/2020  | 292               | 2.63                | 181                                  | 0.75       | 2.95       | 156.14              | 12.66 | 7.6  | 50   | 75.1        |
|            |        |             |                                  |                    | 3/5/2020   | 166               | 0.47                | 161                                  | 1.68       | 3.82       | 74.68               | 4.04  | 6.1  | NA   | 2.8         |
| 2501787356 | M      | 67          | severe                           | improve            | 2/10/2020  | 704               | 3.16                | 263                                  | 0.67       | 4.14       | 374.53              | 296.9 | 13.7 | 660  | 135         |
|            |        |             |                                  |                    | 3/2/2020   | 243               | 1.86                | 237                                  | 2.45       | 2.20       | 63.16               | 4.54  | 7.1  | 50   | 1.1         |
| 2501787359 | M      | 76          | severe                           | improve            | 2/10/2020  | 399               | 1.49                | 168                                  | 0.70       | 5.63       | 448.05              | 155   | 11.8 | 120  | 192.4       |
|            |        |             |                                  |                    | 3/2/2020   | 182               | 0.63                | 220                                  | 1.51       | 3.08       | 150.32              | 2.14  | 8.1  | 0.04 | 1.4         |
| 2501787142 | M      | 64          | severe                           | improve            | 2/10/2020  | 452               | 0.80                | 320                                  | 0.71       | 3.83       | 248.40              | 67.21 | 9.2  | 60   | 46.2        |
|            |        |             |                                  |                    | 3/1/2020   | 267               | 0.22                | 243                                  | 1.33       | 2.22       | ND                  | 1.5   | 6.1  | 20   | 0.5         |
| 2501798951 | F      | 69          | severe                           | improve            | 2/10/2020  | 350               | 0.48                | 217                                  | 0.78       | 3.41       | 88.17               | 103.7 | 13   | 370  | 81.8        |
|            |        |             |                                  |                    | 3/5/2020   | 178               | 1.21                | 286                                  | 1.37       | 1.95       | ND                  | 2.61  | 10   | NA   | 0.7         |
| 2501787345 | F      | 86          | severe                           | improve            | 2/10/2020  | 368               | 1.05                | 238                                  | 0.80       | 3.54       | 328.48              | 39.99 | 13.1 | 130  | 131.1       |
|            |        |             |                                  |                    | 3/1/2020   | 171               | 1.43                | 269                                  | 1.09       | 2.18       | 18.95               | 2.1   | 10.9 | 50   | 6.2         |
| 2501787347 | F      | 69          | severe                           | improve            | 2/10/2020  | 271               | 2.57                | 240                                  | 0.52       | 2.55       | 261.78              | 16.51 | 4.4  | 20   | 25.7        |
|            |        |             |                                  |                    | 3/1/2020   | 250               | 0.21                | 160                                  | 1.48       | 3.54       | ND                  | 1.59  | 4    | 80   | 3.1         |

The patients were blooded both before and after the treatment. Their sera were isolated and used for laboratory detection. “ND” meant the concentration was not detectable. “NA” meant the data was not available. For statistical comparisons, undetectable data (ND) were defined as “0”. LDH is the abbreviation of lactate dehydrogenase.

**Table S4. The information of uninfected people. Related to Figure 1.**

| uninfected people | Gender | Age      | Serum Conc. (pg/ml) |
|-------------------|--------|----------|---------------------|
|                   |        |          | IFP35               |
| 001               | F      | 25 years | 286.085             |
| 002               | F      | 30 years | ND                  |
| 003               | F      | 27 years | ND                  |
| 004               | F      | 29 years | 117.6524*           |
| 005               | F      | 27 years | 87.929*             |
| 006               | F      | 27 years | 28.4822*            |
| 007               | F      | 28 years | ND                  |
| 008               | F      | 32 years | 127.5602*           |
| 009               | F      | 28 years | 276.1772            |
| 010               | F      | 27 years | 241.4999            |
| 011               | F      | 70 years | ND                  |
| 012               | F      | 79 years | ND                  |
| 013               | F      | 71 years | ND                  |
| 014               | F      | 63 years | ND                  |
| 015               | F      | 62 years | ND                  |
| 016               | F      | 62 years | ND                  |
| 017               | F      | 62 years | ND                  |
| 018               | F      | 62 years | ND                  |
| 019               | F      | 63 years | ND                  |
| 020               | F      | 63 years | ND                  |
| 021               | M      | 31 years | 276.1772            |

|     |   |          |          |
|-----|---|----------|----------|
| 022 | M | 29 years | 395.0708 |
| 023 | M | 33 years | ND       |
| 024 | M | 25 years | ND       |
| 025 | M | 33 years | ND       |
| 026 | M | 29 years | ND       |
| 027 | M | 32 years | ND       |
| 028 | M | 33 years | ND       |
| 029 | M | 24 years | ND       |
| 030 | M | 27 years | ND       |
| 031 | M | 62 years | ND       |
| 032 | M | 60 years | ND       |
| 033 | M | 60 years | ND       |
| 034 | M | 71 years | ND       |
| 035 | M | 63 years | ND       |
| 036 | M | 73 years | ND       |
| 037 | M | 66 years | ND       |
| 038 | M | 80 years | ND       |
| 039 | M | 79 years | ND       |
| 040 | M | 67 years | ND       |

“ND” meant the value was not detectable. “NA” meant the data was not available. For statistical comparisons, undetectable data (ND) were defined as “0”. “\*” meant the data was below the limit of detection.

**Table S5. Clinical characteristics and laboratory detection of 112 confirmed COVID-19 patients of Group 1. Related to Figure 1.**

| <b>Characterization</b>               | <b>All patients<br/>N = 112</b> | <b>Not-severely-ill<br/>N = 29</b> | <b>Severely-ill<br/>N = 83</b> |
|---------------------------------------|---------------------------------|------------------------------------|--------------------------------|
| <b>Age - median year (range)</b>      | 64 (31-87)                      | 58 (31-76)                         | 67 (37-87)                     |
| <b>Patient's turnover (No.)</b>       | Improve (90)                    | Improve (29)                       | Improve (61)                   |
|                                       | Aggragation (15)                |                                    | Aggravation (15)               |
|                                       | Death (7)                       |                                    | Death (7)                      |
| <b>Gender</b>                         | <b>No. (%)</b>                  |                                    |                                |
| Male                                  | 51 (46%)                        | 10 (34%)                           | 41 (49%)                       |
| Female                                | 61 (54%)                        | 19 (66%)                           | 42 (51%)                       |
| <b>Blood cell count</b>               | <b>No. (%)</b>                  |                                    |                                |
| <b>Neutrophil</b>                     | <b>No. (%)</b>                  |                                    |                                |
| ≥ 6.3×10 <sup>9</sup> /L              | 29 (25%)                        | 0 (0)                              | 29 (35%)                       |
| 1.8-6.3×10 <sup>9</sup> /L            | 80 (71%)                        | 27 (93%)                           | 52 (63%)                       |
| ≤ 1.8×10 <sup>9</sup> /L              | 4 (4%)                          | 2 (7%)                             | 2 (2%)                         |
| <b>Lymphocyte count</b>               | <b>No. (%)</b>                  |                                    |                                |
| < 1.1×10 <sup>9</sup> /L              | 63 (56%)                        | 7 (24%)                            | 56 (67%)                       |
| Mean ± SD                             | 1.24 ± 0.68                     | 1.61 ± 0.62                        | 1.08 ± 0.60                    |
| <b>Platelet count</b>                 | <b>No. (%)</b>                  |                                    |                                |
| < 125×10 <sup>9</sup> /L              | 9 (8%)                          | 1 (3%)                             | 8 (10%)                        |
| <b>Distribution of other findings</b> | <b>No. (%)</b>                  |                                    |                                |
| CRP (≥ 10 µg/mL)                      | 68 (60%)                        | 8 (28%)                            | 60 (72%)                       |
| Lactose dehydrogenase (≥ 250 U/L)     | 68 (60%)                        | 7 (24%)                            | 61 (73%)                       |

|                                    |          |          |          |
|------------------------------------|----------|----------|----------|
| Procalcitonin ( $\geq 0.05$ ng/mL) | 67 (59%) | 8 (28%)  | 59 (71%) |
| D-dimer ( $\geq 0.5$ $\mu$ g/mL)   | 77 (68%) | 11 (38%) | 65 (78%) |

**Table S6. The eigenvalue and proportion of variance of PC. Related to Figure 2.**

| PC summary | Eigenvalue | Proportion of variance |
|------------|------------|------------------------|
| PC1        | 4.297      | 39.06%                 |
| PC2        | 1.31       | 11.91%                 |
| PC3        | 1.205      | 10.96%                 |
| PC4        | 0.8182     | 7.44%                  |
| PC5        | 0.7663     | 6.97%                  |
| PC6        | 0.6775     | 6.16%                  |
| PC7        | 0.5896     | 5.36%                  |
| PC8        | 0.4413     | 4.01%                  |
| PC9        | 0.3843     | 3.49%                  |
| PC10       | 0.2636     | 2.40%                  |
| PC11       | 0.2475     | 2.25%                  |

**Table S7. Two linear components identified by PCA analysis. Related to Figure 2.**

| Variable   | PC coordinates |              |
|------------|----------------|--------------|
|            | PC1            | PC2          |
| Age        | 0.366544108    | -0.372529379 |
| LDH        | 0.780416637    | 0.252252406  |
| D-dimer    | 0.621952849    | -0.020073195 |
| Platelet   | -0.5235183     | 0.517697281  |
| Lymphocyte | -0.6832239     | 0.259927509  |
| Neutrophil | 0.71501817     | 0.274990703  |
| IFP35      | 0.284744614    | 0.686997811  |
| IL-6       | 0.769585878    | -0.080777968 |
| TNF        | 0.508479132    | 0.418633499  |
| PCT        | 0.509028314    | -0.198843574 |
| CRP        | 0.850426181    | -0.048143317 |

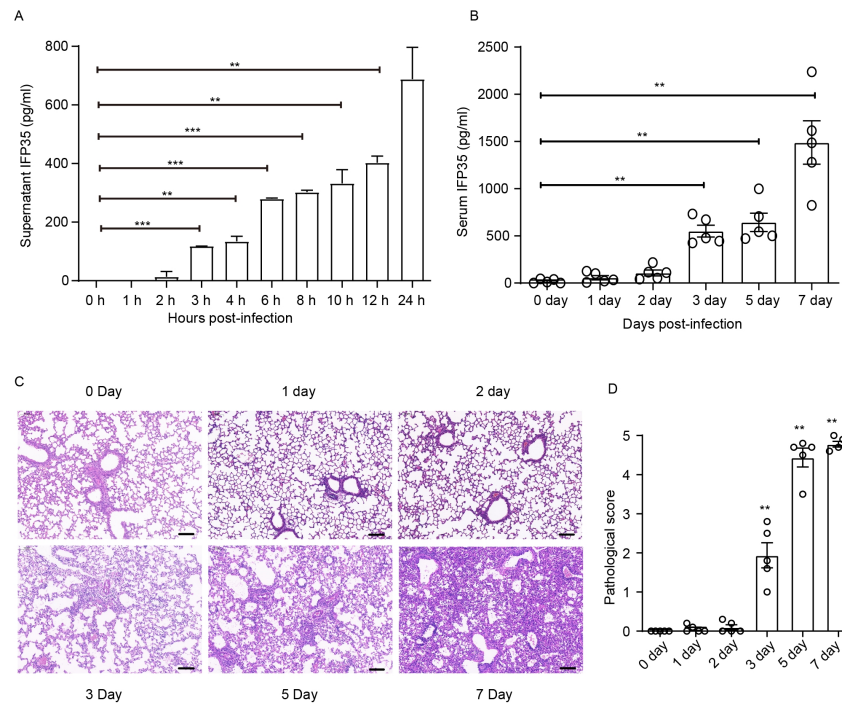

**Figure S1.** The secretion of IFP35 in RAW264.7 cells and C57BL/6J mice infected by influenza virus. Related to Figure 4. (A)  $6 \times 10^6$  RAW264.7 cells were seeded into 6-well plate 12 hours prior to influenza virus infection (5MOI PR8). The supernatant of the cells was collected at 0 h, 1 h, 2 h, 3 h, 4 h, 6 h, 8 h, 10 h, 12 h and 24 h post-infection. The experiment was repeated for 3 times. (B-D) 6-8 week old male C57BL/6J mice were randomly divided into 6 groups (n=5 in each group) and infected with 2LD<sub>50</sub> PR8 virus. After that, each group of mice were bled and isolated for serum at 0 day, 1 day, 2 days, 3 days, 5 days and 7 days post-infection. The serum mIFP35 was detected by ELISA (B). Characteristic lung tissues of the mice staining with hematoxylin and eosin, the scale bar is 100  $\mu$ m (C). The pathological score of all the lung tissues of the mice was shown in (D). Data in (A), (B) and (D) are mean values  $\pm$  SEM. Significance in (A) was calculated with the unpaired student's t test. Significance in (B) and (D) was assessed by Mann-Whitney U test. (\*P < 0.05, \*\*P < 0.01, \*\*\*P < 0.001)
